# Supplementary material for: VaAPRT3 Gene is Associated With Sex Determination in Vitis amurensis
Source: Front Genet. 2021 Dec 23;12:727260. doi: 10.3389/fgene.2021.727260 (PMC8733387; doi:10.3389/fgene.2021.727260)
Supplement: Supplementary file 1 [file Table2.XLSX]

## Sheet: Sheet1
Table S2. Details of varients within the 2.48 Mb candidate region.
chromosome	start	end	Reference base	Mutation	variation_type
2	3260116	3260116	T	C	SNP
2	3260118	3260118	A	G	SNP
2	3260137	3260137	A	T	SNP
2	3260140	3260140	A	G	SNP
2	3260200	3260200	C	T	SNP
2	3260219	3260219	C	T	SNP
2	3260358	3260358	C	A	SNP
2	3260382	3260382	C	T	SNP
2	3260489	3260489	T	G	SNP
2	3260553	3260553	G	A	SNP
2	3260570	3260570	A	T	SNP
2	3260596	3260596	A	T	SNP
2	3260598	3260598	T	G	SNP
2	3260650	3260650	C	A	SNP
2	3260651	3260651	G	A	SNP
2	3260668	3260668	A	T	SNP
2	3260681	3260681	C	T	SNP
2	3260733	3260733	C	G	SNP
2	3260794	3260794	C	T	SNP
2	3260808	3260808	T	C	SNP
2	3260821	3260821	A	T	SNP
2	3260918	3260918	C	T	SNP
2	3260946	3260946	C	G	SNP
2	3260972	3260972	T	C	SNP
2	3261011	3261011	A	C	SNP
2	3261015	3261015	T	G	SNP
2	3261097	3261097	G	C	SNP
2	3261132	3261132	T	C	SNP
2	3261283	3261283	A	T	SNP
2	3261373	3261373	A	T	SNP
2	3261389	3261389	T	C	SNP
2	3261394	3261394	A	G	SNP
2	3261537	3261537	-	TGATGCAGG	Insertion
2	3261604	3261604	T	C	SNP
2	3261680	3261680	A	G	SNP
2	3261714	3261714	T	A	SNP
2	3261748	3261748	T	C	SNP
2	3261755	3261755	A	G	SNP
2	3261790	3261790	C	T	SNP
2	3261833	3261833	A	T	SNP
2	3262011	3262012	CA	-	Deletion
2	3262044	3262044	A	G	SNP
2	3262056	3262058	TAA	-	Deletion
2	3262134	3262134	-	A	Insertion
2	3262135	3262135	T	A	SNP
2	3262194	3262194	A	G	SNP
2	3262206	3262206	G	A	SNP
2	3262216	3262216	A	G	SNP
2	3262243	3262243	G	T	SNP
2	3262327	3262327	A	G	SNP
2	3262470	3262470	T	-	Deletion
2	3262506	3262506	C	T	SNP
2	3262538	3262538	T	G	SNP
2	3262594	3262594	A	G	SNP
2	3262614	3262614	C	T	SNP
2	3262666	3262666	G	A	SNP
2	3262733	3262733	T	C	SNP
2	3262839	3262839	G	A	SNP
2	3262901	3262901	T	G	SNP
2	3263016	3263016	C	G	SNP
2	3263039	3263039	C	T	SNP
2	3263087	3263087	G	T	SNP
2	3263113	3263113	T	A	SNP
2	3263141	3263141	C	T	SNP
2	3263146	3263146	T	C	SNP
2	3263160	3263160	T	G	SNP
2	3263163	3263163	C	T	SNP
2	3263209	3263209	A	C	SNP
2	3263254	3263254	C	T	SNP
2	3263257	3263257	T	G	SNP
2	3263276	3263276	T	A	SNP
2	3263317	3263317	T	-	Deletion
2	3263365	3263365	A	G	SNP
2	3263415	3263415	C	G	SNP
2	3263456	3263456	T	C	SNP
2	3263648	3263648	A	C	SNP
2	3263661	3263661	C	A	SNP
2	3263674	3263674	A	G	SNP
2	3263703	3263703	C	G	SNP
2	3263714	3263714	A	T	SNP
2	3263778	3263778	C	A	SNP
2	3263825	3263825	C	G	SNP
2	3263873	3263873	A	G	SNP
2	3263903	3263903	T	G	SNP
2	3264050	3264050	T	G	SNP
2	3264214	3264214	C	T	SNP
2	3264220	3264220	G	A	SNP
2	3264237	3264237	C	T	SNP
2	3264296	3264296	A	T	SNP
2	3264368	3264368	C	A	SNP
2	3264384	3264384	G	A	SNP
2	3264859	3264859	A	G	SNP
2	3265444	3265444	C	T	SNP
2	3265494	3265494	C	T	SNP
2	3265500	3265500	C	T	SNP
2	3265562	3265562	C	T	SNP
2	3265618	3265618	C	A	SNP
2	3265633	3265633	T	C	SNP
2	3265643	3265643	T	C	SNP
2	3265665	3265665	C	T	SNP
2	3265673	3265673	C	T	SNP
2	3265682	3265682	G	A	SNP
2	3265701	3265701	C	T	SNP
2	3265712	3265712	C	T	SNP
2	3265719	3265719	T	C	SNP
2	3265813	3265813	G	A	SNP
2	3265828	3265828	A	C	SNP
2	3265839	3265839	C	A	SNP
2	3266617	3266617	C	T	SNP
2	3266635	3266635	G	A	SNP
2	3267210	3267210	G	A	SNP
2	3267265	3267265	G	C	SNP
2	3267272	3267272	G	T	SNP
2	3267310	3267310	G	T	SNP
2	3267369	3267369	C	T	SNP
2	3267385	3267385	-	CCCAAGT	Insertion
2	3267396	3267396	A	G	SNP
2	3267428	3267428	C	T	SNP
2	3267446	3267446	C	A	SNP
2	3267451	3267451	G	A	SNP
2	3267490	3267490	T	C	SNP
2	3267534	3267534	T	A	SNP
2	3267613	3267613	A	G	SNP
2	3267615	3267615	A	T	SNP
2	3267636	3267636	G	A	SNP
2	3267640	3267640	-	TTTTTTAC	Insertion
2	3267663	3267663	T	C	SNP
2	3267678	3267678	T	G	SNP
2	3267688	3267688	C	T	SNP
2	3267694	3267694	C	T	SNP
2	3267708	3267708	C	A	SNP
2	3267727	3267743	GATCATGCTATTTTGTG	-	Deletion
2	3267761	3267761	G	A	SNP
2	3267782	3267782	T	C	SNP
2	3267791	3267791	C	T	SNP
2	3267805	3267805	A	G	SNP
2	3267820	3267820	A	-	Deletion
2	3267838	3267838	T	C	SNP
2	3267848	3267848	G	A	SNP
2	3267913	3267913	-	TATTATCCATG	Insertion
2	3267919	3267919	T	A	SNP
2	3268040	3268040	T	C	SNP
2	3268145	3268145	A	C	SNP
2	3268231	3268231	T	C	SNP
2	3268259	3268259	A	T	SNP
2	3268333	3268342	TATGAAGAGG	-	Deletion
2	3268376	3268376	A	G	SNP
2	3268398	3268398	-	CCC	Insertion
2	3268405	3268405	C	A	SNP
2	3268438	3268461	AGAGAGAGAGAGGGTGCTTGAGCT	-	Deletion
2	3268461	3268461	-	ACAG	Insertion
2	3268472	3268472	-	T	Insertion
2	3268539	3268539	T	C	SNP
2	3268609	3268609	T	C	SNP
2	3268691	3268691	-	AGATTCTAGGGATGGTC	Insertion
2	3268979	3268979	A	T	SNP
2	3268992	3268992	T	C	SNP
2	3268997	3268997	C	T	SNP
2	3269018	3269018	G	A	SNP
2	3269091	3269093	TTC	-	Deletion
2	3269097	3269097	C	G	SNP
2	3269155	3269155	C	T	SNP
2	3269179	3269179	A	G	SNP
2	3269190	3269190	T	C	SNP
2	3269206	3269206	A	G	SNP
2	3269224	3269224	A	G	SNP
2	3269245	3269245	A	G	SNP
2	3269249	3269249	T	C	SNP
2	3269426	3269426	G	A	SNP
2	3269432	3269432	C	T	SNP
2	3269599	3269599	G	A	SNP
2	3269623	3269623	G	A	SNP
2	3269628	3269628	-	A	Insertion
2	3269667	3269667	G	T	SNP
2	3270253	3270253	T	G	SNP
2	3270255	3270255	C	A	SNP
2	3270280	3270280	A	-	Deletion
2	3270374	3270374	G	A	SNP
2	3270441	3270449	TATTTTTAA	-	Deletion
2	3270463	3270463	C	T	SNP
2	3270559	3270559	T	C	SNP
2	3270629	3270629	A	C	SNP
2	3270667	3270667	C	T	SNP
2	3270673	3270673	A	-	Deletion
2	3270697	3270697	G	C	SNP
2	3270708	3270721	ATTGAAGAGAAAAT	-	Deletion
2	3270773	3270773	G	A	SNP
2	3270824	3270824	G	C	SNP
2	3270966	3270966	A	C	SNP
2	3271014	3271014	A	G	SNP
2	3271017	3271017	A	G	SNP
2	3271218	3271218	C	T	SNP
2	3271235	3271235	G	A	SNP
2	3271262	3271262	C	T	SNP
2	3271281	3271281	T	C	SNP
2	3271332	3271332	T	C	SNP
2	3271363	3271363	C	G	SNP
2	3271449	3271449	G	-	Deletion
2	3271577	3271577	T	C	SNP
2	3271596	3271596	-	TTATTAAT	Insertion
2	3271601	3271601	G	T	SNP
2	3271778	3271778	T	C	SNP
2	3271786	3271786	G	A	SNP
2	3271804	3271805	TC	-	Deletion
2	3272164	3272164	C	T	SNP
2	3272535	3272535	T	A	SNP
2	3272620	3272620	-	A	Insertion
2	3272718	3272718	-	G	Insertion
2	3272729	3272729	T	C	SNP
2	3272802	3272802	T	C	SNP
2	3272863	3272863	C	T	SNP
2	3272894	3272894	C	T	SNP
2	3272984	3272984	C	T	SNP
2	3273011	3273011	A	G	SNP
2	3273037	3273037	T	C	SNP
2	3273049	3273049	A	C	SNP
2	3273148	3273148	C	T	SNP
2	3273226	3273226	C	T	SNP
2	3273236	3273236	G	A	SNP
2	3273263	3273263	C	T	SNP
2	3273367	3273367	G	A	SNP
2	3273442	3273442	T	A	SNP
2	3273512	3273512	A	G	SNP
2	3273535	3273535	A	C	SNP
2	3273559	3273559	A	G	SNP
2	3273750	3273750	A	G	SNP
2	3273758	3273758	G	T	SNP
2	3273779	3273779	T	A	SNP
2	3273797	3273797	C	G	SNP
2	3273880	3273880	A	G	SNP
2	3274041	3274041	T	C	SNP
2	3274168	3274168	C	T	SNP
2	3274329	3274338	AAAACATGTT	-	Deletion
2	3274388	3274388	A	T	SNP
2	3274440	3274440	G	A	SNP
2	3274441	3274443	TCC	-	Deletion
2	3274464	3274464	-	AAAA	Insertion
2	3274575	3274575	C	A	SNP
2	3274608	3274608	G	C	SNP
2	3274648	3274648	A	G	SNP
2	3274760	3274760	T	C	SNP
2	3274799	3274799	A	G	SNP
2	3274811	3274811	G	A	SNP
2	3274833	3274833	A	G	SNP
2	3274874	3274874	C	T	SNP
2	3274954	3274954	C	A	SNP
2	3275059	3275059	G	-	Deletion
2	3275079	3275079	-	T	Insertion
2	3275149	3275149	C	A	SNP
2	3275229	3275229	G	A	SNP
2	3275234	3275234	C	A	SNP
2	3275324	3275324	C	G	SNP
2	3275363	3275363	-	TA	Insertion
2	3275377	3275377	G	A	SNP
2	3275391	3275391	T	A	SNP
2	3275942	3275942	T	C	SNP
2	3275984	3275984	-	ATCTCTTATTCTAGATCCAGAGAAAACC	Insertion
2	3275987	3275987	G	T	SNP
2	3276053	3276053	A	G	SNP
2	3276134	3276134	C	T	SNP
2	3276153	3276153	G	T	SNP
2	3276175	3276175	-	CCTAAATCGCTTGGGCATG	Insertion
2	3276222	3276222	T	G	SNP
2	3276242	3276242	A	G	SNP
2	3276268	3276268	G	A	SNP
2	3276290	3276290	A	G	SNP
2	3276305	3276305	A	G	SNP
2	3276332	3276332	A	G	SNP
2	3276339	3276339	A	G	SNP
2	3276575	3276576	TT	-	Deletion
2	3276615	3276636	AAATAACATCTGCCCTAAGTGC	-	Deletion
2	3276653	3276653	G	A	SNP
2	3276678	3276678	A	-	Deletion
2	3276746	3276746	C	G	SNP
2	3276852	3276852	G	C	SNP
2	3277076	3277076	C	T	SNP
2	3277127	3277127	C	T	SNP
2	3277135	3277136	AA	-	Deletion
2	3277161	3277161	C	T	SNP
2	3277186	3277186	A	C	SNP
2	3277293	3277293	G	A	SNP
2	3277426	3277426	G	C	SNP
2	3277607	3277607	A	G	SNP
2	3277648	3277648	G	A	SNP
2	3277938	3277938	C	T	SNP
2	3278003	3278003	A	G	SNP
2	3278307	3278307	A	G	SNP
2	3278386	3278386	C	T	SNP
2	3278422	3278422	A	G	SNP
2	3278441	3278441	C	A	SNP
2	3278452	3278452	C	T	SNP
2	3278520	3278520	T	C	SNP
2	3278601	3278601	C	A	SNP
2	3278649	3278649	T	C	SNP
2	3278723	3278723	A	G	SNP
2	3278901	3278901	-	A	Insertion
2	3278983	3278983	-	GAA	Insertion
2	3279121	3279121	T	C	SNP
2	3279236	3279236	A	G	SNP
2	3279250	3279250	T	C	SNP
2	3279275	3279275	A	G	SNP
2	3279305	3279305	A	T	SNP
2	3279471	3279471	T	A	SNP
2	3279538	3279538	A	G	SNP
2	3279747	3279747	A	G	SNP
2	3279908	3279908	C	G	SNP
2	3279978	3279978	T	G	SNP
2	3280057	3280058	CT	-	Deletion
2	3280223	3280223	G	A	SNP
2	3280369	3280369	-	A	Insertion
2	3280416	3280425	AAAAAAAGAA	-	Deletion
2	3280507	3280507	A	G	SNP
2	3280691	3280691	T	-	Deletion
2	3280744	3280744	A	T	SNP
2	3280771	3280771	C	T	SNP
2	3280833	3280833	-	A	Insertion
2	3280979	3280979	A	-	Deletion
2	3281071	3281071	A	G	SNP
2	3281113	3281113	A	G	SNP
2	3281154	3281154	A	G	SNP
2	3281523	3281523	A	G	SNP
2	3281558	3281558	T	A	SNP
2	3281843	3281843	C	A	SNP
2	3281870	3281870	A	C	SNP
2	3282009	3282009	C	T	SNP
2	3282076	3282076	C	G	SNP
2	3282086	3282086	A	C	SNP
2	3282144	3282144	T	C	SNP
2	3282240	3282240	T	C	SNP
2	3282256	3282256	A	C	SNP
2	3282287	3282287	-	A	Insertion
2	3282311	3282311	T	G	SNP
2	3282370	3282370	A	C	SNP
2	3282589	3282589	T	-	Deletion
2	3282788	3282788	A	G	SNP
2	3282842	3282842	C	A	SNP
2	3282860	3282860	T	C	SNP
2	3282987	3282987	A	G	SNP
2	3283041	3283041	A	G	SNP
2	3283174	3283174	G	C	SNP
2	3283560	3283560	A	G	SNP
2	3283582	3283582	T	C	SNP
2	3283742	3283742	C	T	SNP
2	3283827	3283827	C	T	SNP
2	3283989	3283989	T	C	SNP
2	3284113	3284113	A	C	SNP
2	3284114	3284114	T	A	SNP
2	3284307	3284307	C	G	SNP
2	3284488	3284488	A	G	SNP
2	3284563	3284563	G	A	SNP
2	3284662	3284662	C	T	SNP
2	3284667	3284667	A	T	SNP
2	3284878	3284878	T	C	SNP
2	3284925	3284925	-	TACACCTGTTTAGC	Insertion
2	3284960	3284960	-	TTTTTTT	Insertion
2	3285025	3285025	A	G	SNP
2	3285203	3285203	T	C	SNP
2	3285401	3285401	T	C	SNP
2	3285419	3285419	C	A	SNP
2	3285472	3285472	C	A	SNP
2	3285538	3285538	A	G	SNP
2	3285587	3285587	C	A	SNP
2	3285598	3285598	C	G	SNP
2	3285776	3285776	T	C	SNP
2	3285843	3285843	A	-	Deletion
2	3285999	3285999	A	T	SNP
2	3286013	3286013	A	C	SNP
2	3286034	3286034	C	T	SNP
2	3286040	3286040	T	-	Deletion
2	3286065	3286065	A	T	SNP
2	3286241	3286241	T	C	SNP
2	3286286	3286286	A	G	SNP
2	3286688	3286688	G	A	SNP
2	3287097	3287097	A	T	SNP
2	3287241	3287241	-	AA	Insertion
2	3287268	3287268	A	G	SNP
2	3287321	3287321	A	-	Deletion
2	3287341	3287341	G	C	SNP
2	3287718	3287718	T	C	SNP
2	3287786	3287787	AT	-	Deletion
2	3287797	3287797	T	C	SNP
2	3287830	3287830	G	A	SNP
2	3287975	3287975	G	A	SNP
2	3288032	3288032	T	-	Deletion
2	3288033	3288033	A	C	SNP
2	3288079	3288079	C	T	SNP
2	3288103	3288104	AT	-	Deletion
2	3288147	3288147	G	T	SNP
2	3288396	3288396	A	C	SNP
2	3288423	3288423	T	A	SNP
2	3288564	3288564	A	C	SNP
2	3288598	3288598	G	T	SNP
2	3288619	3288619	T	C	SNP
2	3288662	3288662	A	G	SNP
2	3288669	3288669	T	A	SNP
2	3288752	3288752	G	C	SNP
2	3288763	3288763	G	A	SNP
2	3288811	3288811	G	C	SNP
2	3288842	3288842	G	C	SNP
2	3288885	3288885	T	A	SNP
2	3289205	3289205	T	A	SNP
2	3289309	3289309	G	A	SNP
2	3289361	3289361	A	T	SNP
2	3289392	3289392	T	G	SNP
2	3289634	3289634	G	A	SNP
2	3289663	3289663	A	G	SNP
2	3289781	3289781	G	A	SNP
2	3289838	3289838	T	C	SNP
2	3289843	3289846	CAAA	-	Deletion
2	3289881	3289881	G	A	SNP
2	3289911	3289911	C	T	SNP
2	3289955	3289959	TTTTG	-	Deletion
2	3290034	3290034	T	C	SNP
2	3290050	3290050	C	A	SNP
2	3290071	3290071	T	C	SNP
2	3290073	3290073	G	A	SNP
2	3290092	3290092	A	G	SNP
2	3290153	3290153	T	C	SNP
2	3290217	3290217	A	G	SNP
2	3290291	3290291	T	A	SNP
2	3290377	3290377	G	A	SNP
2	3290475	3290475	C	T	SNP
2	3290524	3290524	G	A	SNP
2	3290583	3290583	A	G	SNP
2	3290614	3290614	A	C	SNP
2	3290633	3290633	A	C	SNP
2	3290755	3290755	T	C	SNP
2	3290852	3290852	-	AA	Insertion
2	3290934	3290934	G	T	SNP
2	3290972	3290972	A	T	SNP
2	3291140	3291140	C	T	SNP
2	3291166	3291166	T	A	SNP
2	3291258	3291258	T	A	SNP
2	3291316	3291316	G	A	SNP
2	3291390	3291390	A	T	SNP
2	3291471	3291471	A	G	SNP
2	3291480	3291480	A	C	SNP
2	3291720	3291720	A	T	SNP
2	3291726	3291726	A	T	SNP
2	3291745	3291745	T	C	SNP
2	3291867	3291867	A	T	SNP
2	3291909	3291909	T	C	SNP
2	3291944	3291944	C	G	SNP
2	3291956	3291956	G	A	SNP
2	3291990	3291990	A	G	SNP
2	3292086	3292086	C	T	SNP
2	3292204	3292204	G	A	SNP
2	3292265	3292267	TGG	-	Deletion
2	3292502	3292502	G	C	SNP
2	3292516	3292516	A	T	SNP
2	3292816	3292816	C	T	SNP
2	3293017	3293017	A	C	SNP
2	3293039	3293039	T	A	SNP
2	3293112	3293112	C	A	SNP
2	3293137	3293137	T	G	SNP
2	3293151	3293152	TC	-	Deletion
2	3293199	3293199	A	G	SNP
2	3293211	3293211	A	G	SNP
2	3293259	3293259	C	A	SNP
2	3293305	3293305	C	T	SNP
2	3293335	3293335	A	T	SNP
2	3293368	3293368	C	G	SNP
2	3293397	3293397	A	T	SNP
2	3294026	3294026	A	G	SNP
2	3294081	3294085	CAGTC	-	Deletion
2	3294118	3294118	A	C	SNP
2	3294404	3294404	A	T	SNP
2	3294411	3294420	TCTTTTTCGT	-	Deletion
2	3294462	3294462	G	T	SNP
2	3294495	3294516	TTAATCTGAAACTAATATGTAG	-	Deletion
2	3294693	3294693	A	G	SNP
2	3294706	3294706	G	A	SNP
2	3294806	3294806	A	C	SNP
2	3294919	3294919	T	C	SNP
2	3294921	3294921	G	A	SNP
2	3294958	3294958	A	G	SNP
2	3294974	3294974	T	G	SNP
2	3294989	3294989	A	G	SNP
2	3295034	3295034	A	-	Deletion
2	3295039	3295039	A	C	SNP
2	3295089	3295089	G	A	SNP
2	3295156	3295156	A	C	SNP
2	3295168	3295168	G	A	SNP
2	3295237	3295237	T	C	SNP
2	3295266	3295266	G	A	SNP
2	3295277	3295277	C	T	SNP
2	3295302	3295302	A	G	SNP
2	3295451	3295451	A	G	SNP
2	3295495	3295495	A	G	SNP
2	3295571	3295571	G	A	SNP
2	3295617	3295617	A	C	SNP
2	3295646	3295646	T	A	SNP
2	3295662	3295662	G	A	SNP
2	3295677	3295685	CTAGAGAAC	-	Deletion
2	3295702	3295702	G	A	SNP
2	3295722	3295722	-	A	Insertion
2	3295963	3295963	C	T	SNP
2	3296032	3296032	G	C	SNP
2	3296075	3296075	G	A	SNP
2	3296100	3296101	CA	-	Deletion
2	3296103	3296103	T	A	SNP
2	3296216	3296216	A	G	SNP
2	3296224	3296224	G	A	SNP
2	3296238	3296238	T	G	SNP
2	3296263	3296263	G	A	SNP
2	3296286	3296286	G	A	SNP
2	3296302	3296302	A	G	SNP
2	3296480	3296480	G	A	SNP
2	3296489	3296489	G	A	SNP
2	3296565	3296565	C	T	SNP
2	3296569	3296569	T	G	SNP
2	3296643	3296643	-	G	Insertion
2	3296657	3296657	A	G	SNP
2	3296667	3296667	A	G	SNP
2	3296689	3296689	T	C	SNP
2	3296702	3296702	T	C	SNP
2	3296708	3296708	G	A	SNP
2	3296728	3296728	C	T	SNP
2	3296756	3296756	A	G	SNP
2	3296783	3296783	T	C	SNP
2	3298027	3298027	A	G	SNP
2	3298287	3298287	T	C	SNP
2	3298302	3298302	G	A	SNP
2	3298459	3298459	C	T	SNP
2	3298528	3298528	A	G	SNP
2	3298546	3298546	A	T	SNP
2	3298564	3298564	A	G	SNP
2	3298573	3298573	A	G	SNP
2	3299230	3299230	T	G	SNP
2	3299235	3299235	C	A	SNP
2	3299256	3299256	G	T	SNP
2	3299310	3299310	G	A	SNP
2	3299329	3299329	T	C	SNP
2	3299559	3299559	C	T	SNP
2	3302237	3302237	-	A	Insertion
2	3302543	3302543	T	C	SNP
2	3302564	3302564	T	A	SNP
2	3302606	3302606	T	C	SNP
2	3302618	3302618	A	G	SNP
2	3302645	3302645	A	G	SNP
2	3302705	3302705	T	C	SNP
2	3302720	3302720	A	G	SNP
2	3302796	3302797	AA	-	Deletion
2	3302857	3302857	G	A	SNP
2	3302987	3302987	A	G	SNP
2	3304357	3304357	A	-	Deletion
2	3304408	3304411	ATGA	-	Deletion
2	3304421	3304421	-	TGG	Insertion
2	3304484	3304484	C	T	SNP
2	3304542	3304542	-	TTTTTTTT	Insertion
2	3304603	3304603	A	G	SNP
2	3304613	3304613	C	T	SNP
2	3304735	3304735	A	G	SNP
2	3305145	3305150	ATTCCT	-	Deletion
2	3305192	3305192	T	C	SNP
2	3305195	3305195	T	C	SNP
2	3305269	3305269	A	G	SNP
2	3305311	3305311	T	C	SNP
2	3305338	3305338	A	G	SNP
2	3305347	3305347	C	G	SNP
2	3305444	3305444	G	C	SNP
2	3306610	3306610	-	TATATG	Insertion
2	3306651	3306651	A	T	SNP
2	3306758	3306758	T	C	SNP
2	3306775	3306775	C	-	Deletion
2	3306781	3306781	C	T	SNP
2	3306845	3306845	T	C	SNP
2	3306869	3306869	A	G	SNP
2	3318878	3318878	-	A	Insertion
2	3318900	3318900	A	G	SNP
2	3318933	3318933	A	G	SNP
2	3320649	3320649	G	A	SNP
2	3321073	3321073	A	C	SNP
2	3321105	3321105	A	G	SNP
2	3324305	3324308	TTGA	-	Deletion
2	3324317	3324320	TTTT	-	Deletion
2	3324323	3324323	A	-	Deletion
2	3328967	3328967	G	A	SNP
2	3328982	3328982	C	T	SNP
2	3329001	3329001	C	T	SNP
2	3329002	3329002	G	A	SNP
2	3329026	3329026	A	G	SNP
2	3329031	3329046	TATTTTTTTTATTTAC	-	Deletion
2	3329188	3329188	G	A	SNP
2	3329302	3329302	G	A	SNP
2	3329313	3329313	G	T	SNP
2	3329318	3329318	T	C	SNP
2	3329332	3329332	A	G	SNP
2	3329364	3329364	T	G	SNP
2	3329583	3329583	G	A	SNP
2	3329593	3329593	G	A	SNP
2	3329740	3329740	C	T	SNP
2	3329809	3329809	T	C	SNP
2	3329822	3329822	T	C	SNP
2	3329876	3329876	A	G	SNP
2	3329917	3329917	G	A	SNP
2	3329993	3329993	C	T	SNP
2	3329997	3329997	C	T	SNP
2	3330020	3330020	C	A	SNP
2	3330022	3330022	C	T	SNP
2	3330038	3330038	C	T	SNP
2	3330049	3330049	C	T	SNP
2	3330063	3330063	G	A	SNP
2	3330070	3330070	C	T	SNP
2	3330135	3330135	T	A	SNP
2	3330213	3330213	C	T	SNP
2	3330218	3330218	G	A	SNP
2	3330441	3330441	T	C	SNP
2	3330442	3330442	C	T	SNP
2	3330459	3330459	A	G	SNP
2	3330985	3330985	A	T	SNP
2	3330995	3330995	A	G	SNP
2	3331017	3331017	T	G	SNP
2	3331135	3331135	T	C	SNP
2	3331210	3331210	T	C	SNP
2	3331214	3331214	T	C	SNP
2	3331249	3331249	C	T	SNP
2	3331288	3331288	C	T	SNP
2	3331310	3331311	AT	-	Deletion
2	3331337	3331337	G	T	SNP
2	3331519	3331519	A	G	SNP
2	3332853	3332853	T	A	SNP
2	3345124	3345124	G	-	Deletion
2	3345151	3345151	A	T	SNP
2	3349312	3349312	C	T	SNP
2	3349403	3349403	A	G	SNP
2	3353367	3353367	G	A	SNP
2	3353391	3353391	C	T	SNP
2	3353421	3353421	T	C	SNP
2	3353429	3353429	A	G	SNP
2	3353446	3353446	C	A	SNP
2	3353448	3353448	T	C	SNP
2	3356505	3356505	A	G	SNP
2	3356532	3356532	G	T	SNP
2	3359055	3359055	T	C	SNP
2	3359058	3359092	ACTGGAAGTCAATCTTGCATGGAGAATAAATAACA	-	Deletion
2	3359145	3359145	C	T	SNP
2	3359298	3359298	C	T	SNP
2	3359336	3359336	C	T	SNP
2	3359361	3359361	C	T	SNP
2	3359362	3359362	G	A	SNP
2	3359406	3359406	C	T	SNP
2	3359413	3359413	G	A	SNP
2	3359422	3359422	C	T	SNP
2	3359431	3359431	-	A	Insertion
2	3360112	3360112	A	G	SNP
2	3360121	3360121	C	T	SNP
2	3360129	3360129	A	T	SNP
2	3360203	3360203	T	C	SNP
2	3360208	3360208	G	A	SNP
2	3361065	3361065	T	C	SNP
2	3362230	3362230	G	A	SNP
2	3362231	3362231	G	A	SNP
2	3362427	3362427	T	C	SNP
2	3362998	3362998	C	T	SNP
2	3363127	3363127	T	C	SNP
2	3363186	3363186	A	G	SNP
2	3363190	3363190	G	C	SNP
2	3363394	3363394	C	T	SNP
2	3363419	3363419	T	C	SNP
2	3363427	3363427	G	A	SNP
2	3363448	3363448	C	G	SNP
2	3363449	3363449	G	A	SNP
2	3363537	3363537	G	T	SNP
2	3363594	3363594	G	T	SNP
2	3363598	3363598	A	G	SNP
2	3363742	3363742	G	A	SNP
2	3363743	3363743	C	T	SNP
2	3363798	3363798	G	A	SNP
2	3363812	3363812	T	C	SNP
2	3363816	3363817	GC	-	Deletion
2	3363894	3363894	T	C	SNP
2	3363919	3363919	G	A	SNP
2	3364095	3364095	T	C	SNP
2	3364121	3364121	G	A	SNP
2	3364157	3364157	T	C	SNP
2	3364173	3364173	T	C	SNP
2	3364182	3364182	A	C	SNP
2	3364276	3364276	C	T	SNP
2	3364319	3364319	G	A	SNP
2	3364326	3364326	G	C	SNP
2	3364386	3364386	C	A	SNP
2	3364418	3364418	G	A	SNP
2	3364430	3364430	G	A	SNP
2	3364494	3364494	C	G	SNP
2	3364495	3364495	G	A	SNP
2	3364609	3364609	G	A	SNP
2	3364620	3364620	C	T	SNP
2	3364634	3364634	G	T	SNP
2	3364646	3364646	C	T	SNP
2	3364914	3364914	G	A	SNP
2	3364930	3364930	T	C	SNP
2	3364934	3364934	-	C	Insertion
2	3364950	3364950	G	C	SNP
2	3364951	3364951	G	A	SNP
2	3365638	3365638	A	G	SNP
2	3365662	3365662	T	G	SNP
2	3365739	3365739	A	G	SNP
2	3365790	3365790	A	G	SNP
2	3365813	3365813	A	-	Deletion
2	3365815	3365815	C	G	SNP
2	3365954	3365954	T	C	SNP
2	3366896	3366896	G	A	SNP
2	3367782	3367782	T	A	SNP
2	3367793	3367793	C	T	SNP
2	3367833	3367833	G	A	SNP
2	3367845	3367845	A	G	SNP
2	3367875	3367875	T	A	SNP
2	3367897	3367897	T	C	SNP
2	3375011	3375011	T	C	SNP
2	3377288	3377288	A	G	SNP
2	3377299	3377299	T	C	SNP
2	3377305	3377305	C	A	SNP
2	3377380	3377380	C	A	SNP
2	3377512	3377512	C	T	SNP
2	3377516	3377516	C	T	SNP
2	3377542	3377542	G	A	SNP
2	3378844	3378844	-	C	Insertion
2	3378846	3378846	C	T	SNP
2	3378862	3378862	G	T	SNP
2	3378947	3378947	C	T	SNP
2	3378988	3378988	A	T	SNP
2	3379008	3379008	C	T	SNP
2	3379133	3379133	G	A	SNP
2	3379188	3379188	C	T	SNP
2	3379198	3379198	G	A	SNP
2	3379284	3379284	A	G	SNP
2	3379293	3379293	A	G	SNP
2	3379302	3379302	C	T	SNP
2	3379322	3379322	T	C	SNP
2	3379326	3379326	G	A	SNP
2	3379381	3379381	G	A	SNP
2	3379407	3379407	G	C	SNP
2	3379413	3379413	-	T	Insertion
2	3379426	3379426	T	C	SNP
2	3379432	3379432	-	T	Insertion
2	3379465	3379465	G	A	SNP
2	3379521	3379521	C	G	SNP
2	3382203	3382203	T	C	SNP
2	3382252	3382252	-	A	Insertion
2	3382282	3382282	-	T	Insertion
2	3387559	3387559	T	G	SNP
2	3387575	3387575	A	G	SNP
2	3387577	3387577	C	T	SNP
2	3387631	3387631	C	T	SNP
2	3387647	3387651	AAAAA	-	Deletion
2	3387663	3387663	T	C	SNP
2	3387674	3387674	T	C	SNP
2	3387691	3387691	G	A	SNP
2	3387811	3387811	A	G	SNP
2	3387867	3387867	C	A	SNP
2	3387870	3387870	T	C	SNP
2	3388516	3388516	A	G	SNP
2	3388577	3388577	A	G	SNP
2	3388593	3388606	AATTGGATTTTAAC	-	Deletion
2	3388642	3388642	G	A	SNP
2	3388644	3388644	A	G	SNP
2	3388660	3388674	AAGATAGACATATTT	-	Deletion
2	3388967	3388967	A	G	SNP
2	3389015	3389015	A	G	SNP
2	3389040	3389040	C	T	SNP
2	3389046	3389046	G	C	SNP
2	3389086	3389086	C	A	SNP
2	3389088	3389088	G	A	SNP
2	3389104	3389104	G	A	SNP
2	3389107	3389107	C	T	SNP
2	3389126	3389126	C	A	SNP
2	3389134	3389134	C	T	SNP
2	3389198	3389198	T	C	SNP
2	3389204	3389207	TTAG	-	Deletion
2	3389224	3389224	G	A	SNP
2	3389227	3389227	C	T	SNP
2	3389883	3389883	C	G	SNP
2	3389910	3389910	C	A	SNP
2	3390007	3390007	T	C	SNP
2	3390023	3390025	TTT	-	Deletion
2	3390037	3390037	A	G	SNP
2	3390058	3390058	C	T	SNP
2	3390120	3390120	C	A	SNP
2	3390136	3390136	T	C	SNP
2	3390182	3390182	C	T	SNP
2	3390245	3390245	A	G	SNP
2	3390260	3390260	T	C	SNP
2	3390439	3390439	C	T	SNP
2	3390469	3390469	A	G	SNP
2	3390477	3390477	C	T	SNP
2	3390510	3390510	C	T	SNP
2	3390517	3390517	T	C	SNP
2	3390527	3390527	C	T	SNP
2	3391002	3391002	C	T	SNP
2	3391009	3391009	C	A	SNP
2	3391633	3391633	C	A	SNP
2	3391652	3391652	T	C	SNP
2	3391766	3391766	G	-	Deletion
2	3391767	3391767	C	A	SNP
2	3392348	3392348	T	G	SNP
2	3392365	3392365	-	AATC	Insertion
2	3392374	3392374	T	C	SNP
2	3392471	3392471	A	G	SNP
2	3392515	3392515	C	A	SNP
2	3392623	3392623	C	T	SNP
2	3392649	3392649	C	T	SNP
2	3392661	3392661	G	T	SNP
2	3392856	3392856	G	T	SNP
2	3392871	3392871	T	A	SNP
2	3392876	3392876	G	A	SNP
2	3392894	3392894	A	G	SNP
2	3393071	3393071	C	A	SNP
2	3393085	3393085	T	C	SNP
2	3393183	3393183	A	C	SNP
2	3393367	3393367	G	A	SNP
2	3393394	3393394	A	G	SNP
2	3393435	3393435	A	G	SNP
2	3393462	3393462	G	C	SNP
2	3393502	3393502	G	C	SNP
2	3393740	3393740	G	A	SNP
2	3393834	3393834	T	C	SNP
2	3393856	3393856	C	T	SNP
2	3393906	3393906	G	A	SNP
2	3393946	3393946	-	A	Insertion
2	3393962	3393962	A	T	SNP
2	3393968	3393968	G	A	SNP
2	3393981	3393981	T	G	SNP
2	3393997	3393997	T	C	SNP
2	3394022	3394022	-	C	Insertion
2	3394024	3394028	TGGGG	-	Deletion
2	3394049	3394049	A	G	SNP
2	3394165	3394165	T	A	SNP
2	3394219	3394219	C	G	SNP
2	3394236	3394236	C	T	SNP
2	3394237	3394237	G	T	SNP
2	3394294	3394294	T	C	SNP
2	3394307	3394307	C	G	SNP
2	3394313	3394316	AACA	-	Deletion
2	3394480	3394480	C	T	SNP
2	3394526	3394526	C	A	SNP
2	3394555	3394555	T	C	SNP
2	3394561	3394561	A	G	SNP
2	3394593	3394593	T	G	SNP
2	3394613	3394613	G	A	SNP
2	3394653	3394653	T	C	SNP
2	3394658	3394658	T	A	SNP
2	3394770	3394770	C	T	SNP
2	3394772	3394772	G	A	SNP
2	3394806	3394806	G	A	SNP
2	3394823	3394823	G	C	SNP
2	3394832	3394832	T	C	SNP
2	3394919	3394919	A	G	SNP
2	3394993	3394993	A	T	SNP
2	3395043	3395043	T	A	SNP
2	3395045	3395045	G	C	SNP
2	3395073	3395073	T	A	SNP
2	3395099	3395102	GAAT	-	Deletion
2	3395112	3395112	A	G	SNP
2	3395118	3395118	T	-	Deletion
2	3395160	3395160	G	A	SNP
2	3395190	3395190	G	T	SNP
2	3395205	3395205	C	T	SNP
2	3395215	3395215	C	T	SNP
2	3395258	3395258	A	T	SNP
2	3395291	3395291	A	G	SNP
2	3395304	3395304	-	T	Insertion
2	3395374	3395374	A	T	SNP
2	3395393	3395393	A	T	SNP
2	3395485	3395485	T	C	SNP
2	3395516	3395516	T	A	SNP
2	3395525	3395525	C	G	SNP
2	3395618	3395618	-	T	Insertion
2	3395619	3395619	A	T	SNP
2	3395787	3395787	-	C	Insertion
2	3395932	3395932	C	-	Deletion
2	3395998	3395998	G	A	SNP
2	3396004	3396028	AAAGAGGATTGGGAAGAGGCCAGAG	-	Deletion
2	3396044	3396044	T	C	SNP
2	3396054	3396054	T	C	SNP
2	3396060	3396060	C	T	SNP
2	3396100	3396100	A	T	SNP
2	3396165	3396165	T	C	SNP
2	3396229	3396229	T	C	SNP
2	3396231	3396231	G	T	SNP
2	3396367	3396370	TTTG	-	Deletion
2	3396371	3396371	G	A	SNP
2	3396828	3396828	A	G	SNP
2	3397115	3397115	A	G	SNP
2	3397127	3397127	A	C	SNP
2	3397215	3397215	A	T	SNP
2	3397519	3397519	T	C	SNP
2	3398198	3398198	A	G	SNP
2	3398200	3398200	C	T	SNP
2	3400731	3400731	T	C	SNP
2	3401005	3401005	T	G	SNP
2	3401623	3401623	T	G	SNP
2	3403462	3403462	A	G	SNP
2	3403540	3403540	A	G	SNP
2	3403549	3403549	T	C	SNP
2	3403630	3403630	T	C	SNP
2	3403690	3403690	C	T	SNP
2	3403704	3403704	T	C	SNP
2	3404074	3404074	A	G	SNP
2	3405010	3405010	C	T	SNP
2	3405874	3405874	C	T	SNP
2	3406742	3406742	T	C	SNP
2	3406748	3406748	A	-	Deletion
2	3406848	3406848	T	C	SNP
2	3406899	3406899	G	A	SNP
2	3407010	3407010	A	T	SNP
2	3407017	3407017	G	A	SNP
2	3407036	3407036	A	G	SNP
2	3407104	3407105	CA	-	Deletion
2	3407128	3407128	C	T	SNP
2	3407164	3407164	A	G	SNP
2	3407173	3407173	A	G	SNP
2	3407245	3407245	A	G	SNP
2	3407261	3407261	A	G	SNP
2	3407544	3407544	T	C	SNP
2	3407595	3407595	G	A	SNP
2	3407607	3407607	C	T	SNP
2	3407638	3407638	C	T	SNP
2	3407670	3407670	G	A	SNP
2	3407688	3407688	C	T	SNP
2	3407699	3407699	A	G	SNP
2	3407719	3407719	C	T	SNP
2	3407754	3407754	T	C	SNP
2	3407912	3407912	C	A	SNP
2	3407933	3407933	G	A	SNP
2	3407940	3407951	ACCCATCTTCAT	-	Deletion
2	3407955	3407955	C	T	SNP
2	3407963	3407963	A	C	SNP
2	3408059	3408059	G	A	SNP
2	3408071	3408071	T	C	SNP
2	3408111	3408111	C	A	SNP
2	3408125	3408125	T	C	SNP
2	3408142	3408142	C	T	SNP
2	3408167	3408167	C	T	SNP
2	3408180	3408180	C	T	SNP
2	3408199	3408199	C	T	SNP
2	3408230	3408230	T	C	SNP
2	3408253	3408253	C	T	SNP
2	3408272	3408272	C	T	SNP
2	3408312	3408312	C	T	SNP
2	3408315	3408315	C	A	SNP
2	3408346	3408346	G	A	SNP
2	3408353	3408353	T	C	SNP
2	3408369	3408369	C	A	SNP
2	3408501	3408501	C	T	SNP
2	3408504	3408504	G	A	SNP
2	3408536	3408536	G	A	SNP
2	3408548	3408548	T	G	SNP
2	3408559	3408559	C	T	SNP
2	3408574	3408574	G	A	SNP
2	3408584	3408584	C	T	SNP
2	3408596	3408596	A	G	SNP
2	3408613	3408613	T	C	SNP
2	3408625	3408625	C	T	SNP
2	3408683	3408683	C	T	SNP
2	3408700	3408700	A	C	SNP
2	3408724	3408724	G	A	SNP
2	3408725	3408725	G	T	SNP
2	3408770	3408770	C	A	SNP
2	3408952	3408952	G	C	SNP
2	3408954	3408954	C	T	SNP
2	3409044	3409044	C	T	SNP
2	3409131	3409131	T	C	SNP
2	3409195	3409195	C	T	SNP
2	3409203	3409203	G	A	SNP
2	3409244	3409244	T	C	SNP
2	3409246	3409246	G	A	SNP
2	3409280	3409280	A	G	SNP
2	3409290	3409290	C	T	SNP
2	3409304	3409304	G	T	SNP
2	3409402	3409402	C	T	SNP
2	3409481	3409481	A	G	SNP
2	3409513	3409513	C	T	SNP
2	3409548	3409548	G	A	SNP
2	3409601	3409601	C	T	SNP
2	3409629	3409629	G	A	SNP
2	3409646	3409646	C	T	SNP
2	3409666	3409666	C	T	SNP
2	3409667	3409667	C	T	SNP
2	3409689	3409689	G	A	SNP
2	3409699	3409699	C	T	SNP
2	3409710	3409710	G	A	SNP
2	3409731	3409731	G	A	SNP
2	3409734	3409734	G	A	SNP
2	3409803	3409803	A	G	SNP
2	3409854	3409854	G	A	SNP
2	3409864	3409864	T	C	SNP
2	3409901	3409901	A	T	SNP
2	3409956	3409956	G	A	SNP
2	3409960	3409960	T	C	SNP
2	3410004	3410004	T	C	SNP
2	3410076	3410076	C	T	SNP
2	3410113	3410113	A	-	Deletion
2	3410169	3410169	T	A	SNP
2	3410190	3410190	A	G	SNP
2	3410366	3410366	A	-	Deletion
2	3410856	3410856	G	C	SNP
2	3410866	3410866	C	A	SNP
2	3410873	3410876	GCGC	-	Deletion
2	3410890	3410890	T	G	SNP
2	3410907	3410907	G	C	SNP
2	3410919	3410919	A	C	SNP
2	3410938	3410938	A	T	SNP
2	3410941	3410941	C	T	SNP
2	3410970	3410970	A	G	SNP
2	3411002	3411002	A	G	SNP
2	3416258	3416258	C	A	SNP
2	3416296	3416296	G	T	SNP
2	3416312	3416312	T	C	SNP
2	3416318	3416318	A	G	SNP
2	3416373	3416373	T	C	SNP
2	3416562	3416562	A	G	SNP
2	3416567	3416567	T	C	SNP
2	3416599	3416599	A	G	SNP
2	3416648	3416648	C	T	SNP
2	3419055	3419055	A	G	SNP
2	3419056	3419056	C	T	SNP
2	3419101	3419101	T	A	SNP
2	3419116	3419116	G	T	SNP
2	3419131	3419131	C	A	SNP
2	3419158	3419158	G	A	SNP
2	3419163	3419163	A	T	SNP
2	3419189	3419189	G	A	SNP
2	3419204	3419204	C	G	SNP
2	3419208	3419208	-	T	Insertion
2	3419303	3419303	T	C	SNP
2	3419954	3419954	T	C	SNP
2	3419956	3419956	A	T	SNP
2	3420031	3420031	C	T	SNP
2	3420060	3420060	C	T	SNP
2	3420117	3420117	A	T	SNP
2	3420127	3420127	T	C	SNP
2	3420547	3420547	A	G	SNP
2	3420609	3420609	T	G	SNP
2	3420639	3420639	A	G	SNP
2	3421053	3421053	G	A	SNP
2	3421061	3421061	C	T	SNP
2	3421082	3421082	A	G	SNP
2	3421101	3421101	T	C	SNP
2	3421103	3421103	G	A	SNP
2	3422280	3422280	T	C	SNP
2	3422290	3422290	A	G	SNP
2	3422343	3422344	AT	-	Deletion
2	3422353	3422353	A	C	SNP
2	3422361	3422361	T	C	SNP
2	3422372	3422372	A	T	SNP
2	3422402	3422402	T	A	SNP
2	3422413	3422413	C	T	SNP
2	3422440	3422442	TAC	-	Deletion
2	3422453	3422453	G	A	SNP
2	3422455	3422455	-	AA	Insertion
2	3422477	3422477	T	A	SNP
2	3422487	3422487	A	G	SNP
2	3422516	3422516	C	A	SNP
2	3422739	3422739	A	G	SNP
2	3422751	3422751	T	A	SNP
2	3422819	3422819	C	G	SNP
2	3422845	3422845	C	T	SNP
2	3422849	3422849	-	AACCCATGG	Insertion
2	3422919	3422919	A	C	SNP
2	3423314	3423314	G	C	SNP
2	3423342	3423342	A	G	SNP
2	3423351	3423351	T	G	SNP
2	3423546	3423546	T	C	SNP
2	3423664	3423664	A	G	SNP
2	3423681	3423681	T	C	SNP
2	3423990	3423990	G	A	SNP
2	3424004	3424004	C	T	SNP
2	3424017	3424017	T	G	SNP
2	3424045	3424045	T	A	SNP
2	3424447	3424447	C	T	SNP
2	3424551	3424551	G	A	SNP
2	3424563	3424563	G	A	SNP
2	3424710	3424710	C	G	SNP
2	3424752	3424752	A	G	SNP
2	3424763	3424763	T	G	SNP
2	3424806	3424806	A	C	SNP
2	3424827	3424827	T	G	SNP
2	3424869	3424869	A	G	SNP
2	3424889	3424889	C	T	SNP
2	3424902	3424902	T	A	SNP
2	3424915	3424915	A	T	SNP
2	3424923	3424923	T	C	SNP
2	3425393	3425393	A	G	SNP
2	3425415	3425415	G	A	SNP
2	3425426	3425426	T	C	SNP
2	3425434	3425434	G	A	SNP
2	3425472	3425472	A	-	Deletion
2	3425480	3425480	A	-	Deletion
2	3425494	3425494	G	A	SNP
2	3425500	3425500	T	C	SNP
2	3425519	3425519	T	A	SNP
2	3425535	3425535	G	T	SNP
2	3426047	3426047	C	T	SNP
2	3426060	3426060	A	T	SNP
2	3426097	3426097	A	G	SNP
2	3426100	3426100	G	A	SNP
2	3426140	3426159	GATTTTTTTTTTGTTTTTTG	-	Deletion
2	3426236	3426236	C	T	SNP
2	3426258	3426258	C	A	SNP
2	3426265	3426265	T	C	SNP
2	3426313	3426313	G	A	SNP
2	3426370	3426370	A	C	SNP
2	3426374	3426374	C	T	SNP
2	3426395	3426395	T	G	SNP
2	3426406	3426406	G	A	SNP
2	3426483	3426483	C	G	SNP
2	3426489	3426489	T	-	Deletion
2	3426530	3426530	T	C	SNP
2	3426564	3426564	T	C	SNP
2	3426583	3426583	T	C	SNP
2	3426597	3426597	C	T	SNP
2	3426616	3426616	C	A	SNP
2	3431462	3431462	C	A	SNP
2	3431481	3431481	C	A	SNP
2	3431483	3431483	T	C	SNP
2	3431508	3431508	G	A	SNP
2	3431514	3431514	A	T	SNP
2	3431573	3431573	A	G	SNP
2	3431618	3431618	T	C	SNP
2	3431672	3431672	G	A	SNP
2	3431673	3431673	-	C	Insertion
2	3431690	3431690	T	C	SNP
2	3431740	3431740	-	A	Insertion
2	3431759	3431764	AAAAAT	-	Deletion
2	3431769	3431769	C	T	SNP
2	3431775	3431775	T	A	SNP
2	3431843	3431843	C	A	SNP
2	3431873	3431873	A	G	SNP
2	3431989	3431989	A	T	SNP
2	3432005	3432005	A	G	SNP
2	3432054	3432054	T	C	SNP
2	3432065	3432065	C	T	SNP
2	3432130	3432130	G	A	SNP
2	3432140	3432140	G	A	SNP
2	3432156	3432156	A	G	SNP
2	3432254	3432254	G	A	SNP
2	3432374	3432374	A	C	SNP
2	3432382	3432382	G	A	SNP
2	3432394	3432394	C	T	SNP
2	3432594	3432594	C	T	SNP
2	3432614	3432614	C	T	SNP
2	3432704	3432704	C	T	SNP
2	3432726	3432726	T	C	SNP
2	3432737	3432739	ATT	-	Deletion
2	3432757	3432757	C	T	SNP
2	3432776	3432776	T	A	SNP
2	3432787	3432787	T	G	SNP
2	3432807	3432807	C	T	SNP
2	3432824	3432824	A	G	SNP
2	3432839	3432839	-	ATT	Insertion
2	3432882	3432890	CAAGTGATA	-	Deletion
2	3432940	3432940	C	T	SNP
2	3432963	3432963	T	A	SNP
2	3432978	3432978	C	A	SNP
2	3432992	3432992	G	A	SNP
2	3433001	3433001	A	G	SNP
2	3433010	3433010	A	T	SNP
2	3433026	3433026	G	A	SNP
2	3436356	3436356	A	G	SNP
2	3436419	3436419	T	C	SNP
2	3436427	3436427	G	C	SNP
2	3436437	3436437	G	A	SNP
2	3436444	3436444	G	T	SNP
2	3436494	3436504	TTCTCTCTCTT	-	Deletion
2	3438660	3438665	TCTCTC	-	Deletion
2	3438756	3438756	A	G	SNP
2	3438768	3438768	T	A	SNP
2	3438961	3438961	T	C	SNP
2	3439472	3439472	T	C	SNP
2	3439535	3439535	A	G	SNP
2	3439552	3439552	-	AATTTTCAAATTT	Insertion
2	3439748	3439748	G	C	SNP
2	3439926	3439926	G	A	SNP
2	3440029	3440029	A	C	SNP
2	3440105	3440105	C	A	SNP
2	3440218	3440218	G	A	SNP
2	3440458	3440458	T	C	SNP
2	3440649	3440649	C	T	SNP
2	3441008	3441008	G	C	SNP
2	3441062	3441066	GGATG	-	Deletion
2	3441165	3441165	C	T	SNP
2	3441226	3441226	A	G	SNP
2	3441308	3441308	T	G	SNP
2	3441320	3441320	G	A	SNP
2	3441461	3441461	A	T	SNP
2	3441507	3441507	C	T	SNP
2	3441542	3441542	G	T	SNP
2	3442537	3442537	A	G	SNP
2	3442779	3442779	G	A	SNP
2	3442859	3442859	T	A	SNP
2	3443000	3443000	T	G	SNP
2	3443106	3443106	G	T	SNP
2	3443109	3443109	G	T	SNP
2	3443125	3443125	C	A	SNP
2	3443237	3443237	T	C	SNP
2	3443296	3443296	C	-	Deletion
2	3443360	3443360	G	C	SNP
2	3443409	3443409	T	C	SNP
2	3443642	3443642	A	G	SNP
2	3443696	3443696	A	T	SNP
2	3443773	3443773	T	G	SNP
2	3443774	3443774	G	C	SNP
2	3443789	3443789	T	C	SNP
2	3443792	3443792	G	A	SNP
2	3443858	3443858	G	A	SNP
2	3443885	3443885	C	T	SNP
2	3443897	3443897	G	T	SNP
2	3443994	3443994	G	A	SNP
2	3444009	3444009	C	T	SNP
2	3444022	3444022	T	C	SNP
2	3444080	3444080	-	TA	Insertion
2	3444127	3444127	T	C	SNP
2	3444196	3444196	-	G	Insertion
2	3444264	3444264	G	A	SNP
2	3444269	3444269	C	T	SNP
2	3444299	3444299	T	C	SNP
2	3444333	3444333	G	A	SNP
2	3444353	3444353	G	T	SNP
2	3444458	3444458	-	AAA	Insertion
2	3444491	3444491	G	A	SNP
2	3444600	3444600	T	A	SNP
2	3444878	3444878	T	-	Deletion
2	3444896	3444896	T	C	SNP
2	3444910	3444910	G	A	SNP
2	3444967	3444967	C	T	SNP
2	3444968	3444968	T	C	SNP
2	3445022	3445022	T	G	SNP
2	3445024	3445024	A	G	SNP
2	3445190	3445190	A	G	SNP
2	3445367	3445367	G	T	SNP
2	3445488	3445488	A	G	SNP
2	3445498	3445498	A	G	SNP
2	3445530	3445530	A	C	SNP
2	3445616	3445616	T	A	SNP
2	3445642	3445642	G	A	SNP
2	3445837	3445837	A	G	SNP
2	3445838	3445838	G	T	SNP
2	3446007	3446007	-	TT	Insertion
2	3446218	3446218	C	G	SNP
2	3446244	3446244	T	C	SNP
2	3446347	3446347	C	T	SNP
2	3446376	3446376	G	A	SNP
2	3446553	3446553	G	C	SNP
2	3446578	3446578	A	C	SNP
2	3446602	3446602	G	C	SNP
2	3446618	3446618	T	C	SNP
2	3446719	3446719	A	T	SNP
2	3447520	3447520	T	C	SNP
2	3447530	3447531	AT	-	Deletion
2	3447644	3447644	G	A	SNP
2	3447651	3447651	C	T	SNP
2	3447664	3447664	C	T	SNP
2	3447684	3447684	C	T	SNP
2	3447687	3447687	T	A	SNP
2	3447855	3447855	A	C	SNP
2	3447969	3447969	A	C	SNP
2	3447999	3447999	G	A	SNP
2	3448004	3448004	A	G	SNP
2	3448056	3448056	G	C	SNP
2	3448090	3448090	A	T	SNP
2	3448132	3448132	T	A	SNP
2	3448140	3448140	G	A	SNP
2	3448342	3448342	C	-	Deletion
2	3448423	3448423	T	C	SNP
2	3448435	3448435	G	C	SNP
2	3448498	3448498	C	A	SNP
2	3448564	3448564	A	G	SNP
2	3448578	3448578	G	A	SNP
2	3448643	3448643	-	AA	Insertion
2	3448647	3448647	T	A	SNP
2	3448671	3448671	T	C	SNP
2	3448692	3448692	T	C	SNP
2	3449098	3449098	A	G	SNP
2	3449165	3449165	C	T	SNP
2	3449178	3449178	T	C	SNP
2	3449209	3449209	A	C	SNP
2	3449210	3449210	A	G	SNP
2	3449237	3449237	T	G	SNP
2	3449334	3449334	C	G	SNP
2	3449696	3449696	A	C	SNP
2	3449698	3449698	G	A	SNP
2	3449720	3449720	C	A	SNP
2	3449768	3449768	G	A	SNP
2	3449898	3449898	T	A	SNP
2	3449912	3449912	A	T	SNP
2	3449973	3449973	G	A	SNP
2	3449974	3449974	G	A	SNP
2	3450000	3450000	G	T	SNP
2	3450004	3450004	T	-	Deletion
2	3450044	3450044	C	T	SNP
2	3450321	3450321	G	A	SNP
2	3450537	3450537	T	C	SNP
2	3450542	3450542	T	A	SNP
2	3450607	3450607	G	T	SNP
2	3450663	3450663	A	G	SNP
2	3450686	3450686	C	T	SNP
2	3450718	3450718	A	G	SNP
2	3450743	3450745	TTT	-	Deletion
2	3450779	3450779	G	T	SNP
2	3450804	3450804	C	T	SNP
2	3450826	3450826	T	G	SNP
2	3450842	3450842	C	T	SNP
2	3450889	3450889	T	C	SNP
2	3450900	3450900	T	C	SNP
2	3451008	3451008	-	TGCT	Insertion
2	3451011	3451011	T	C	SNP
2	3451028	3451028	G	T	SNP
2	3451039	3451039	G	A	SNP
2	3451143	3451143	A	G	SNP
2	3451144	3451144	A	G	SNP
2	3451163	3451163	C	T	SNP
2	3451164	3451164	G	A	SNP
2	3451179	3451179	C	G	SNP
2	3451195	3451195	A	T	SNP
2	3451211	3451211	C	T	SNP
2	3451229	3451229	A	G	SNP
2	3451282	3451282	-	AT	Insertion
2	3451342	3451342	A	-	Deletion
2	3451363	3451363	-	T	Insertion
2	3451371	3451371	T	A	SNP
2	3451428	3451428	A	T	SNP
2	3451495	3451495	C	T	SNP
2	3451496	3451496	T	C	SNP
2	3451559	3451559	T	C	SNP
2	3451622	3451622	G	A	SNP
2	3451641	3451641	G	T	SNP
2	3451657	3451657	-	T	Insertion
2	3451683	3451683	T	C	SNP
2	3451739	3451740	TC	-	Deletion
2	3451774	3451774	A	T	SNP
2	3451828	3451828	T	A	SNP
2	3451880	3451880	A	G	SNP
2	3451936	3451936	A	T	SNP
2	3451980	3451980	G	A	SNP
2	3452009	3452009	C	A	SNP
2	3452056	3452056	A	T	SNP
2	3452065	3452065	T	A	SNP
2	3452078	3452078	A	C	SNP
2	3452137	3452149	TTTTAAAAAAAAA	-	Deletion
2	3452179	3452179	T	-	Deletion
2	3452181	3452181	T	A	SNP
2	3452196	3452196	T	-	Deletion
2	3452260	3452260	T	C	SNP
2	3452264	3452264	A	G	SNP
2	3452329	3452329	-	GTTTAG	Insertion
2	3452792	3452792	T	A	SNP
2	3452800	3452800	G	A	SNP
2	3452851	3452851	G	A	SNP
2	3452900	3452908	GAAAATATT	-	Deletion
2	3452921	3452921	G	A	SNP
2	3452925	3452925	G	A	SNP
2	3452944	3452944	C	T	SNP
2	3452999	3452999	G	A	SNP
2	3453064	3453064	A	G	SNP
2	3453072	3453072	G	C	SNP
2	3453226	3453226	A	G	SNP
2	3453313	3453313	T	-	Deletion
2	3453514	3453514	G	T	SNP
2	3453542	3453542	T	G	SNP
2	3453545	3453545	C	T	SNP
2	3453623	3453623	C	T	SNP
2	3453628	3453628	G	A	SNP
2	3453640	3453640	A	G	SNP
2	3453653	3453653	C	G	SNP
2	3453662	3453662	A	G	SNP
2	3453691	3453691	T	C	SNP
2	3453815	3453815	T	C	SNP
2	3453819	3453819	T	G	SNP
2	3453860	3453860	C	T	SNP
2	3453894	3453894	A	-	Deletion
2	3453994	3453994	T	C	SNP
2	3454003	3454003	G	A	SNP
2	3454014	3454014	C	T	SNP
2	3454019	3454019	A	G	SNP
2	3454034	3454034	A	G	SNP
2	3454048	3454048	G	T	SNP
2	3454069	3454069	T	C	SNP
2	3454073	3454073	A	-	Deletion
2	3454103	3454103	T	C	SNP
2	3454164	3454164	C	T	SNP
2	3454196	3454197	TT	-	Deletion
2	3454458	3454460	GTC	-	Deletion
2	3454497	3454497	-	T	Insertion
2	3454511	3454511	-	T	Insertion
2	3454614	3454614	T	C	SNP
2	3454943	3454943	A	C	SNP
2	3454996	3454996	C	T	SNP
2	3455155	3455155	A	C	SNP
2	3455199	3455199	C	A	SNP
2	3455300	3455300	C	T	SNP
2	3455339	3455339	A	-	Deletion
2	3455362	3455362	G	A	SNP
2	3455440	3455440	A	G	SNP
2	3455518	3455518	G	A	SNP
2	3455540	3455540	G	C	SNP
2	3455639	3455639	C	T	SNP
2	3455758	3455758	A	T	SNP
2	3456013	3456026	TTGAGTATTAACTA	-	Deletion
2	3456370	3456370	C	T	SNP
2	3456402	3456402	T	G	SNP
2	3456468	3456468	C	T	SNP
2	3456516	3456516	G	T	SNP
2	3456718	3456718	A	T	SNP
2	3456912	3456912	G	A	SNP
2	3457085	3457085	T	C	SNP
2	3457307	3457307	A	G	SNP
2	3457814	3457814	A	C	SNP
2	3457841	3457841	C	T	SNP
2	3457932	3457932	A	C	SNP
2	3457965	3457965	G	A	SNP
2	3457977	3457977	-	AAAAAAA	Insertion
2	3457992	3457992	A	G	SNP
2	3457997	3457997	G	T	SNP
2	3458008	3458008	C	T	SNP
2	3458028	3458028	C	A	SNP
2	3458105	3458105	A	G	SNP
2	3458118	3458118	A	T	SNP
2	3458157	3458157	T	C	SNP
2	3458247	3458247	A	G	SNP
2	3458585	3458585	A	T	SNP
2	3458592	3458592	G	C	SNP
2	3458613	3458613	A	T	SNP
2	3458645	3458645	G	T	SNP
2	3458730	3458730	C	G	SNP
2	3458788	3458788	G	T	SNP
2	3458817	3458817	G	T	SNP
2	3458927	3458927	C	T	SNP
2	3458999	3458999	A	T	SNP
2	3459051	3459051	A	T	SNP
2	3459086	3459086	A	G	SNP
2	3459172	3459172	A	G	SNP
2	3459297	3459297	G	A	SNP
2	3459347	3459347	C	G	SNP
2	3459376	3459376	T	A	SNP
2	3459558	3459558	A	G	SNP
2	3459615	3459615	A	C	SNP
2	3459710	3459710	T	A	SNP
2	3459802	3459802	-	CATTGG	Insertion
2	3459821	3459821	G	A	SNP
2	3459826	3459826	C	G	SNP
2	3459887	3459887	T	C	SNP
2	3459892	3459892	T	A	SNP
2	3459933	3459933	A	T	SNP
2	3460109	3460109	T	G	SNP
2	3460268	3460268	G	A	SNP
2	3460316	3460342	CCAGTTTCCTTAAACTTTTATTTCCTT	-	Deletion
2	3460376	3460376	A	C	SNP
2	3460404	3460404	G	A	SNP
2	3460418	3460418	T	C	SNP
2	3460502	3460502	T	C	SNP
2	3460542	3460542	T	C	SNP
2	3460571	3460571	T	A	SNP
2	3460592	3460592	C	G	SNP
2	3460662	3460662	C	G	SNP
2	3460757	3460757	C	T	SNP
2	3460836	3460836	G	A	SNP
2	3460845	3460845	C	T	SNP
2	3460877	3460877	C	T	SNP
2	3460879	3460879	A	G	SNP
2	3460988	3460988	T	G	SNP
2	3461021	3461021	C	T	SNP
2	3461037	3461037	T	C	SNP
2	3461044	3461044	A	C	SNP
2	3461065	3461065	A	T	SNP
2	3461183	3461183	T	C	SNP
2	3461261	3461261	T	C	SNP
2	3461379	3461379	C	T	SNP
2	3461419	3461419	T	C	SNP
2	3461494	3461494	A	G	SNP
2	3461511	3461511	G	C	SNP
2	3461522	3461522	-	TGGCAAAAG	Insertion
2	3461531	3461531	T	A	SNP
2	3461542	3461542	G	A	SNP
2	3461611	3461611	G	A	SNP
2	3461620	3461620	T	C	SNP
2	3461730	3461730	C	A	SNP
2	3461910	3461910	A	G	SNP
2	3462037	3462037	A	C	SNP
2	3462180	3462180	-	GT	Insertion
2	3462190	3462193	AAGA	-	Deletion
2	3462231	3462231	A	G	SNP
2	3462236	3462236	C	T	SNP
2	3462306	3462306	G	A	SNP
2	3462462	3462462	A	G	SNP
2	3462502	3462502	T	A	SNP
2	3462584	3462584	A	C	SNP
2	3462609	3462609	A	C	SNP
2	3463111	3463111	T	C	SNP
2	3463152	3463152	C	G	SNP
2	3463205	3463205	G	C	SNP
2	3463236	3463236	G	A	SNP
2	3463267	3463267	C	T	SNP
2	3463296	3463296	C	T	SNP
2	3463444	3463444	A	G	SNP
2	3463463	3463463	A	G	SNP
2	3463601	3463601	G	C	SNP
2	3463748	3463748	-	CA	Insertion
2	3463769	3463769	G	T	SNP
2	3463872	3463872	G	T	SNP
2	3463887	3463887	T	C	SNP
2	3463910	3463910	A	G	SNP
2	3463966	3463966	G	A	SNP
2	3463986	3463986	T	G	SNP
2	3464025	3464025	-	T	Insertion
2	3464320	3464320	C	A	SNP
2	3464535	3464535	C	T	SNP
2	3464708	3464708	A	G	SNP
2	3464736	3464736	A	G	SNP
2	3464788	3464788	A	G	SNP
2	3464870	3464870	C	T	SNP
2	3464888	3464888	G	A	SNP
2	3464896	3464896	-	G	Insertion
2	3464974	3464974	T	C	SNP
2	3465006	3465006	T	C	SNP
2	3465056	3465056	T	A	SNP
2	3465100	3465100	A	C	SNP
2	3465197	3465197	T	C	SNP
2	3465376	3465376	A	G	SNP
2	3465414	3465414	G	A	SNP
2	3465437	3465437	C	A	SNP
2	3465550	3465550	-	TTCAGCC	Insertion
2	3465555	3465555	G	T	SNP
2	3465576	3465576	G	A	SNP
2	3465606	3465606	G	-	Deletion
2	3465642	3465642	G	A	SNP
2	3465670	3465670	T	G	SNP
2	3465746	3465746	G	A	SNP
2	3465755	3465755	G	A	SNP
2	3465779	3465779	T	G	SNP
2	3465848	3465848	G	A	SNP
2	3465868	3465868	A	G	SNP
2	3465895	3465895	A	T	SNP
2	3466042	3466042	G	T	SNP
2	3466074	3466074	G	A	SNP
2	3466083	3466083	-	AAACCAGAACAAAACTAAAATGGACTGA	Insertion
2	3466101	3466101	C	A	SNP
2	3466128	3466129	TT	-	Deletion
2	3466178	3466178	A	T	SNP
2	3466276	3466276	G	A	SNP
2	3466364	3466364	G	T	SNP
2	3466380	3466380	A	G	SNP
2	3466402	3466402	T	G	SNP
2	3466469	3466469	A	G	SNP
2	3466586	3466586	T	C	SNP
2	3466616	3466616	G	A	SNP
2	3466741	3466741	-	A	Insertion
2	3466768	3466768	T	C	SNP
2	3466769	3466769	G	A	SNP
2	3466963	3466963	C	T	SNP
2	3466967	3466967	-	T	Insertion
2	3467000	3467000	T	C	SNP
2	3467035	3467035	-	TG	Insertion
2	3467146	3467146	T	C	SNP
2	3467149	3467149	C	T	SNP
2	3467177	3467177	T	C	SNP
2	3467181	3467181	T	A	SNP
2	3467267	3467267	G	A	SNP
2	3467296	3467296	G	A	SNP
2	3467311	3467311	T	C	SNP
2	3467314	3467314	A	G	SNP
2	3467381	3467381	G	A	SNP
2	3467389	3467389	G	A	SNP
2	3467445	3467445	A	G	SNP
2	3467489	3467489	A	G	SNP
2	3467512	3467512	G	A	SNP
2	3467518	3467518	A	G	SNP
2	3467555	3467555	G	T	SNP
2	3467669	3467669	G	A	SNP
2	3467690	3467690	C	T	SNP
2	3467701	3467701	G	T	SNP
2	3467714	3467714	G	A	SNP
2	3467809	3467809	A	G	SNP
2	3467859	3467859	T	C	SNP
2	3467872	3467872	C	T	SNP
2	3467882	3467882	T	A	SNP
2	3467889	3467889	T	G	SNP
2	3467901	3467901	A	T	SNP
2	3467929	3467929	-	CTTTAC	Insertion
2	3467955	3467955	C	T	SNP
2	3467967	3467967	C	T	SNP
2	3467989	3467989	T	C	SNP
2	3468027	3468027	T	C	SNP
2	3468044	3468044	-	T	Insertion
2	3468138	3468138	A	G	SNP
2	3468145	3468145	T	C	SNP
2	3468160	3468160	A	G	SNP
2	3468173	3468173	G	A	SNP
2	3468185	3468185	A	G	SNP
2	3468541	3468541	-	GTTA	Insertion
2	3468616	3468616	T	A	SNP
2	3468668	3468668	-	TTAATAATTTTTTTCCTT	Insertion
2	3468717	3468717	G	T	SNP
2	3468769	3468769	C	-	Deletion
2	3468771	3468771	C	T	SNP
2	3468785	3468785	A	T	SNP
2	3468824	3468824	T	-	Deletion
2	3468850	3468850	T	G	SNP
2	3468866	3468866	T	C	SNP
2	3468911	3468911	C	T	SNP
2	3469000	3469000	A	T	SNP
2	3469009	3469009	C	T	SNP
2	3469198	3469200	TAC	-	Deletion
2	3469202	3469202	-	T	Insertion
2	3469401	3469401	A	G	SNP
2	3469411	3469411	T	C	SNP
2	3469516	3469516	T	C	SNP
2	3469636	3469636	G	T	SNP
2	3469721	3469721	C	A	SNP
2	3469774	3469774	-	TTCTGACATGCGT	Insertion
2	3469783	3469783	T	C	SNP
2	3469848	3469848	A	T	SNP
2	3469920	3469936	TTTGGGATGACTGATGC	-	Deletion
2	3469952	3469952	G	T	SNP
2	3470018	3470018	A	T	SNP
2	3470019	3470019	A	T	SNP
2	3470164	3470164	T	G	SNP
2	3470177	3470177	T	C	SNP
2	3470184	3470184	A	T	SNP
2	3470202	3470202	A	G	SNP
2	3470218	3470218	T	G	SNP
2	3470233	3470233	C	T	SNP
2	3470257	3470270	TTAATTAGACTTCG	-	Deletion
2	3470282	3470282	T	G	SNP
2	3470364	3470364	T	A	SNP
2	3470496	3470496	A	G	SNP
2	3470596	3470596	T	A	SNP
2	3470601	3470601	G	T	SNP
2	3470623	3470624	AT	-	Deletion
2	3470655	3470665	TAAACTTGGCA	-	Deletion
2	3470698	3470698	G	A	SNP
2	3470953	3470953	T	C	SNP
2	3471071	3471071	C	A	SNP
2	3471077	3471077	A	T	SNP
2	3471104	3471105	GT	-	Deletion
2	3471189	3471189	T	C	SNP
2	3471201	3471201	A	G	SNP
2	3471277	3471277	T	A	SNP
2	3471298	3471298	T	A	SNP
2	3471311	3471311	C	T	SNP
2	3471403	3471403	A	C	SNP
2	3471412	3471412	A	T	SNP
2	3471431	3471431	G	T	SNP
2	3471451	3471451	G	A	SNP
2	3471583	3471583	C	T	SNP
2	3471720	3471720	G	A	SNP
2	3471772	3471772	A	C	SNP
2	3471791	3471791	A	G	SNP
2	3471805	3471805	G	A	SNP
2	3471837	3471837	G	A	SNP
2	3471861	3471861	C	G	SNP
2	3471941	3471941	G	C	SNP
2	3471952	3471952	A	G	SNP
2	3471974	3471974	C	T	SNP
2	3471990	3471990	T	-	Deletion
2	3471993	3471993	A	T	SNP
2	3472019	3472019	A	G	SNP
2	3472101	3472101	A	G	SNP
2	3472106	3472106	G	-	Deletion
2	3472520	3472520	C	T	SNP
2	3472521	3472521	A	G	SNP
2	3472605	3472605	A	T	SNP
2	3472640	3472640	C	T	SNP
2	3472695	3472695	T	A	SNP
2	3472869	3472869	C	T	SNP
2	3472906	3472906	T	A	SNP
2	3472933	3472933	-	T	Insertion
2	3473018	3473018	G	A	SNP
2	3473065	3473065	G	A	SNP
2	3473225	3473225	G	A	SNP
2	3473257	3473257	C	T	SNP
2	3473264	3473264	A	G	SNP
2	3473276	3473276	C	T	SNP
2	3473289	3473289	C	T	SNP
2	3473292	3473292	G	A	SNP
2	3473350	3473350	C	T	SNP
2	3473368	3473368	G	A	SNP
2	3473386	3473386	G	A	SNP
2	3473434	3473434	C	T	SNP
2	3473466	3473466	A	T	SNP
2	3473536	3473536	A	G	SNP
2	3473564	3473564	T	C	SNP
2	3473590	3473590	G	C	SNP
2	3473704	3473704	T	A	SNP
2	3473717	3473717	C	T	SNP
2	3473743	3473743	T	C	SNP
2	3473745	3473745	G	C	SNP
2	3473878	3473878	T	-	Deletion
2	3473972	3473972	C	A	SNP
2	3474019	3474019	T	A	SNP
2	3474022	3474022	C	A	SNP
2	3474134	3474134	A	G	SNP
2	3474243	3474243	G	A	SNP
2	3474355	3474355	C	A	SNP
2	3474432	3474432	A	G	SNP
2	3474435	3474435	G	C	SNP
2	3474454	3474454	A	G	SNP
2	3474465	3474465	G	A	SNP
2	3474521	3474521	G	A	SNP
2	3474550	3474550	C	A	SNP
2	3474794	3474794	G	C	SNP
2	3475081	3475081	T	A	SNP
2	3475110	3475110	A	G	SNP
2	3475114	3475114	G	A	SNP
2	3475283	3475283	G	T	SNP
2	3475433	3475433	G	A	SNP
2	3475435	3475435	C	A	SNP
2	3475556	3475556	G	A	SNP
2	3475567	3475567	G	A	SNP
2	3475575	3475575	T	G	SNP
2	3475585	3475585	-	TTTAAGCC	Insertion
2	3475600	3475600	-	AGG	Insertion
2	3475629	3475629	T	A	SNP
2	3475815	3475815	C	A	SNP
2	3475816	3475816	C	T	SNP
2	3475836	3475836	T	A	SNP
2	3475910	3475910	T	-	Deletion
2	3475931	3475931	G	T	SNP
2	3475970	3475970	A	G	SNP
2	3475999	3475999	T	-	Deletion
2	3476655	3476655	A	G	SNP
2	3476716	3476716	C	T	SNP
2	3476749	3476749	G	T	SNP
2	3476770	3476770	G	A	SNP
2	3476771	3476771	A	G	SNP
2	3476846	3476846	T	C	SNP
2	3476886	3476886	G	A	SNP
2	3476893	3476893	C	T	SNP
2	3476911	3476911	C	T	SNP
2	3476953	3476953	G	T	SNP
2	3476992	3476992	G	C	SNP
2	3477100	3477109	CCCATACCCA	-	Deletion
2	3477177	3477177	A	G	SNP
2	3477255	3477255	C	T	SNP
2	3477307	3477307	G	-	Deletion
2	3477332	3477332	C	T	SNP
2	3477412	3477412	T	C	SNP
2	3477413	3477413	G	A	SNP
2	3477516	3477516	-	TCT	Insertion
2	3477517	3477517	-	CTC	Insertion
2	3477564	3477565	TT	-	Deletion
2	3477581	3477581	T	C	SNP
2	3477589	3477589	G	A	SNP
2	3477613	3477613	A	G	SNP
2	3477651	3477651	T	C	SNP
2	3477691	3477691	A	T	SNP
2	3477865	3477865	G	C	SNP
2	3477953	3477953	G	C	SNP
2	3477968	3477968	T	C	SNP
2	3477985	3477985	T	A	SNP
2	3478003	3478003	A	T	SNP
2	3478017	3478017	G	-	Deletion
2	3478049	3478049	G	A	SNP
2	3478224	3478224	C	T	SNP
2	3478238	3478238	T	A	SNP
2	3478248	3478248	-	GCTAG	Insertion
2	3478309	3478309	C	T	SNP
2	3478312	3478312	A	G	SNP
2	3478370	3478370	T	A	SNP
2	3478398	3478398	T	A	SNP
2	3478416	3478416	G	A	SNP
2	3478453	3478453	T	C	SNP
2	3478476	3478476	C	T	SNP
2	3478477	3478477	C	T	SNP
2	3478521	3478521	G	C	SNP
2	3478571	3478571	T	C	SNP
2	3478578	3478578	G	A	SNP
2	3478600	3478600	T	C	SNP
2	3478601	3478601	T	A	SNP
2	3478646	3478647	AC	-	Deletion
2	3478669	3478669	C	A	SNP
2	3478690	3478690	A	G	SNP
2	3478691	3478691	A	C	SNP
2	3478747	3478747	G	C	SNP
2	3478796	3478796	A	G	SNP
2	3478818	3478818	C	T	SNP
2	3478822	3478822	A	G	SNP
2	3478867	3478867	C	A	SNP
2	3478968	3478968	A	C	SNP
2	3479068	3479068	C	T	SNP
2	3479100	3479100	G	A	SNP
2	3479111	3479111	A	G	SNP
2	3479166	3479166	C	T	SNP
2	3479239	3479239	-	ACCCTCCAGT	Insertion
2	3479271	3479271	T	C	SNP
2	3479283	3479283	C	T	SNP
2	3479338	3479338	-	TTTCCTTTCC	Insertion
2	3479363	3479363	C	T	SNP
2	3479383	3479383	G	A	SNP
2	3479392	3479392	C	A	SNP
2	3479407	3479407	C	G	SNP
2	3479420	3479420	T	G	SNP
2	3479424	3479424	T	A	SNP
2	3479438	3479438	T	C	SNP
2	3479451	3479451	G	A	SNP
2	3479531	3479531	G	A	SNP
2	3479534	3479534	A	C	SNP
2	3479551	3479551	G	A	SNP
2	3479564	3479564	G	T	SNP
2	3479567	3479567	C	T	SNP
2	3479584	3479584	A	-	Deletion
2	3479614	3479614	C	A	SNP
2	3479628	3479628	A	C	SNP
2	3479632	3479632	C	G	SNP
2	3479685	3479685	-	AA	Insertion
2	3479694	3479694	C	A	SNP
2	3479717	3479717	A	T	SNP
2	3479740	3479740	A	G	SNP
2	3479743	3479743	A	-	Deletion
2	3479756	3479756	A	G	SNP
2	3479765	3479765	T	A	SNP
2	3479827	3479827	G	C	SNP
2	3479841	3479841	G	-	Deletion
2	3479851	3479851	T	C	SNP
2	3479883	3479883	A	G	SNP
2	3479898	3479898	G	A	SNP
2	3479911	3479921	ATAACACTTCA	-	Deletion
2	3479930	3479930	C	G	SNP
2	3479940	3479940	C	G	SNP
2	3479956	3479956	C	A	SNP
2	3479976	3479976	A	G	SNP
2	3480002	3480002	T	C	SNP
2	3480098	3480098	-	A	Insertion
2	3480132	3480132	G	A	SNP
2	3480168	3480168	T	A	SNP
2	3480295	3480295	A	G	SNP
2	3480296	3480296	T	C	SNP
2	3480492	3480492	T	G	SNP
2	3480501	3480501	A	T	SNP
2	3480515	3480515	T	A	SNP
2	3480541	3480541	A	G	SNP
2	3480601	3480601	C	A	SNP
2	3480604	3480604	G	A	SNP
2	3480732	3480732	C	G	SNP
2	3480812	3480812	G	A	SNP
2	3480817	3480817	G	T	SNP
2	3480838	3480838	C	G	SNP
2	3480841	3480841	A	C	SNP
2	3480892	3480892	C	T	SNP
2	3480913	3480913	G	-	Deletion
2	3480946	3480946	-	A	Insertion
2	3480949	3480949	-	AT	Insertion
2	3480967	3480967	T	C	SNP
2	3480976	3480976	T	A	SNP
2	3481021	3481021	T	C	SNP
2	3481033	3481033	A	G	SNP
2	3481040	3481040	C	T	SNP
2	3481059	3481059	A	T	SNP
2	3481366	3481366	C	-	Deletion
2	3481390	3481390	A	T	SNP
2	3481474	3481474	-	AT	Insertion
2	3481517	3481517	A	G	SNP
2	3481628	3481628	A	C	SNP
2	3481700	3481700	-	A	Insertion
2	3481710	3481710	C	T	SNP
2	3481728	3481728	G	C	SNP
2	3481826	3481826	T	C	SNP
2	3481831	3481831	A	T	SNP
2	3481967	3481967	T	C	SNP
2	3481994	3481994	G	A	SNP
2	3482005	3482005	T	C	SNP
2	3482039	3482039	T	C	SNP
2	3482059	3482059	A	G	SNP
2	3482060	3482060	G	A	SNP
2	3482081	3482081	A	C	SNP
2	3482097	3482097	A	G	SNP
2	3482163	3482163	T	C	SNP
2	3482170	3482170	C	T	SNP
2	3482217	3482217	G	C	SNP
2	3482231	3482231	A	G	SNP
2	3482252	3482252	-	CA	Insertion
2	3482254	3482278	GTATAGTTTAGAAGGGACTTGAATA	-	Deletion
2	3482281	3482281	T	-	Deletion
2	3482291	3482296	CTTTCC	-	Deletion
2	3482306	3482306	G	A	SNP
2	3482347	3482347	G	A	SNP
2	3482385	3482385	C	A	SNP
2	3482390	3482390	C	T	SNP
2	3482405	3482405	G	T	SNP
2	3482427	3482427	C	A	SNP
2	3482527	3482527	A	T	SNP
2	3482572	3482572	T	A	SNP
2	3482705	3482705	C	G	SNP
2	3482888	3482888	-	T	Insertion
2	3483014	3483014	A	C	SNP
2	3483303	3483303	A	C	SNP
2	3483359	3483359	G	C	SNP
2	3483525	3483525	G	T	SNP
2	3483576	3483576	A	G	SNP
2	3483729	3483729	A	G	SNP
2	3483735	3483735	T	C	SNP
2	3483829	3483829	C	T	SNP
2	3484045	3484045	A	G	SNP
2	3484071	3484071	C	G	SNP
2	3484072	3484072	T	G	SNP
2	3484204	3484204	T	G	SNP
2	3484232	3484232	G	A	SNP
2	3484329	3484329	G	C	SNP
2	3484344	3484344	A	T	SNP
2	3484349	3484349	G	A	SNP
2	3484444	3484444	G	T	SNP
2	3484454	3484454	A	G	SNP
2	3484470	3484470	C	T	SNP
2	3484477	3484477	G	A	SNP
2	3484516	3484516	C	T	SNP
2	3484538	3484538	C	T	SNP
2	3484555	3484555	C	A	SNP
2	3484565	3484565	C	A	SNP
2	3484613	3484614	CA	-	Deletion
2	3484628	3484628	G	C	SNP
2	3484710	3484710	C	G	SNP
2	3484741	3484741	G	A	SNP
2	3484763	3484763	T	G	SNP
2	3484764	3484764	C	T	SNP
2	3484784	3484784	C	T	SNP
2	3484822	3484822	T	-	Deletion
2	3484836	3484836	C	T	SNP
2	3484868	3484868	T	C	SNP
2	3484910	3484910	G	A	SNP
2	3484958	3484958	A	T	SNP
2	3485039	3485039	T	C	SNP
2	3485053	3485053	A	C	SNP
2	3485131	3485131	C	T	SNP
2	3485149	3485149	C	A	SNP
2	3485161	3485161	G	A	SNP
2	3485201	3485201	A	G	SNP
2	3485315	3485315	A	C	SNP
2	3485336	3485336	-	T	Insertion
2	3485337	3485337	G	A	SNP
2	3485408	3485408	A	C	SNP
2	3485444	3485444	A	T	SNP
2	3485549	3485549	A	G	SNP
2	3485598	3485598	T	A	SNP
2	3485674	3485674	G	A	SNP
2	3485689	3485689	T	A	SNP
2	3485722	3485722	C	T	SNP
2	3485783	3485783	A	G	SNP
2	3485810	3485810	A	C	SNP
2	3485815	3485828	GCCTAACAAAATTA	-	Deletion
2	3485834	3485834	-	T	Insertion
2	3485854	3485854	T	C	SNP
2	3485940	3485940	A	G	SNP
2	3486057	3486057	G	A	SNP
2	3486101	3486101	A	G	SNP
2	3486111	3486111	C	A	SNP
2	3486146	3486146	-	A	Insertion
2	3486165	3486165	C	T	SNP
2	3486276	3486276	-	AA	Insertion
2	3486313	3486313	G	A	SNP
2	3486314	3486314	G	A	SNP
2	3486507	3486507	A	G	SNP
2	3486526	3486526	T	-	Deletion
2	3486621	3486621	A	T	SNP
2	3486775	3486775	G	A	SNP
2	3486798	3486798	G	A	SNP
2	3486900	3486900	C	G	SNP
2	3487061	3487061	T	C	SNP
2	3487323	3487323	A	G	SNP
2	3487470	3487470	A	G	SNP
2	3487524	3487524	-	ATTTCG	Insertion
2	3487555	3487555	T	C	SNP
2	3487617	3487617	T	C	SNP
2	3487634	3487674	ATTATTATTATTATTTTTAATTTAACAGAAAAAAAAAAAGC	-	Deletion
2	3487662	3487662	A	-	Deletion
2	3487719	3487719	A	G	SNP
2	3487805	3487805	A	G	SNP
2	3487844	3487845	GA	-	Deletion
2	3487877	3487877	G	A	SNP
2	3487979	3487979	A	G	SNP
2	3487994	3488008	AAATTTATAAAATCT	-	Deletion
2	3488079	3488079	-	T	Insertion
2	3488091	3488091	A	C	SNP
2	3488115	3488115	G	T	SNP
2	3488243	3488243	A	T	SNP
2	3488302	3488302	T	C	SNP
2	3488309	3488309	C	T	SNP
2	3488327	3488327	T	C	SNP
2	3488456	3488456	A	-	Deletion
2	3488506	3488506	C	T	SNP
2	3488617	3488617	T	C	SNP
2	3488697	3488697	C	T	SNP
2	3488729	3488729	T	C	SNP
2	3488734	3488734	A	T	SNP
2	3488893	3488893	G	T	SNP
2	3488949	3488949	T	G	SNP
2	3488955	3488955	A	G	SNP
2	3488966	3488966	A	G	SNP
2	3489006	3489006	G	A	SNP
2	3489028	3489028	C	T	SNP
2	3489043	3489043	G	A	SNP
2	3489058	3489058	G	A	SNP
2	3489112	3489112	T	G	SNP
2	3489355	3489355	A	G	SNP
2	3489358	3489358	A	G	SNP
2	3489389	3489389	T	C	SNP
2	3489498	3489498	A	C	SNP
2	3489703	3489703	-	ACAAAATAATAATAAAA	Insertion
2	3489790	3489790	T	C	SNP
[truncated: 28,007 more rows]
